# Supplementary figures and images for: ICAM-1 Clustering on Endothelial Cells Recruits VCAM-1
Source: Hindawi journal article supplement (doi:10.1155/2010/120328), 2010-01-01

Supplemental Figure 1.

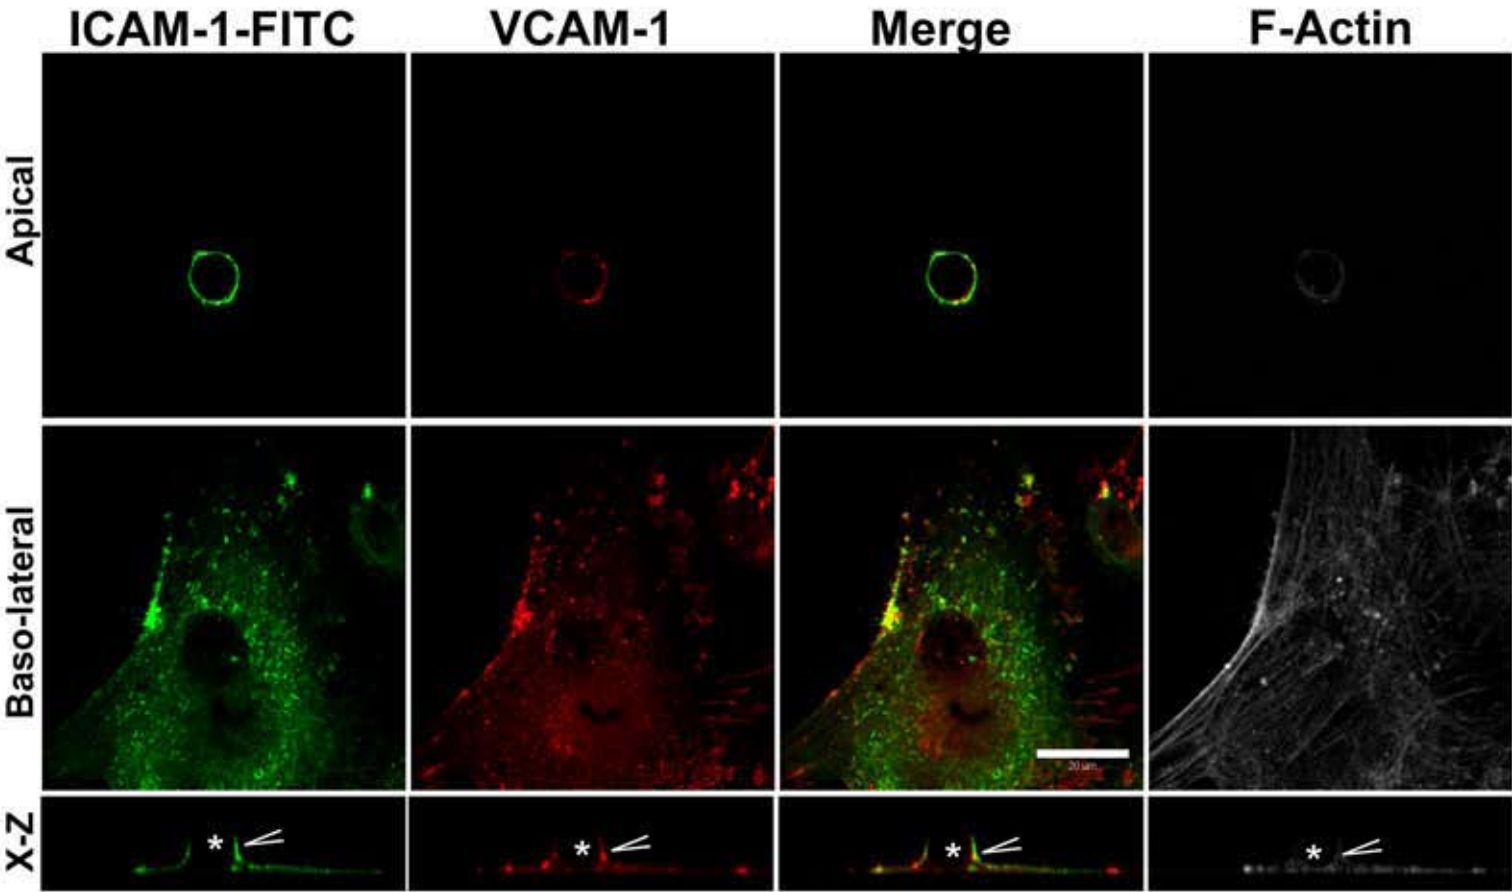

Supplement: f1 [file 120328.f1.pdf]
